# Supplementary material
Source: Springer Nature journal article supplement (https://www.springermedizin.de/resource/supplementary/12885_2008_1385_MOESM2_ESM.pdf/9472980)

**ER****PR****HER2****p53****HCCR-1****(+)**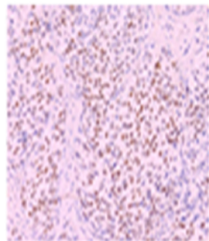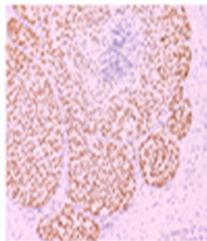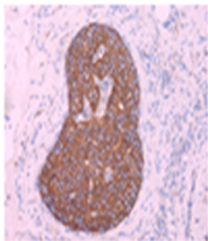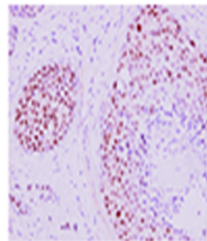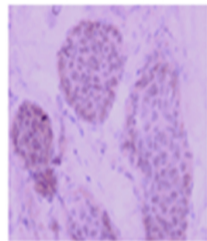**(-)**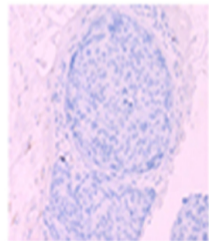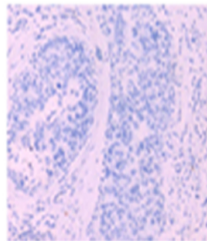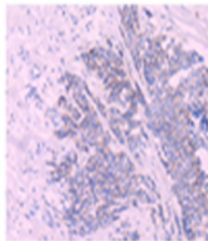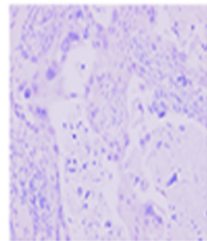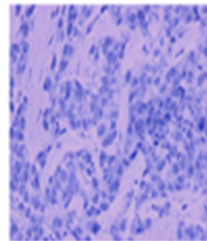

Supplement: MOESM2 [file 9472980]
